# Supplementary material for: Association of triglyceride–glucose index with coronary severity and mortality in patients on dialysis with coronary artery disease
Source: Springer Nature journal article supplement (doi:10.1186/s40001-023-01410-1), 2023-10-17
Supplement: MOESM1 [file 26191482]

### Supplemental Material

**Table S1. Missing variables before and after multiple imputation**

| <b>Characteristic</b> | <b>Before<br/>imputation</b> | <b>After<br/>imputation</b> | <b><i>P</i><br/>value</b> | <b>Missing data,<br/>n (%)</b> |
|-----------------------|------------------------------|-----------------------------|---------------------------|--------------------------------|
| Hemoglobin, g/L       | 105.0 ± 19.8                 | 105.2 ± 19.9                | 0.820                     | 7 (0.7)                        |
| TC, mmol/L            | 3.7 [3.1, 4.5]               | 3.7 [3.1, 4.5]              | 0.957                     | 6 (0.6)                        |
| HDL-C, mmol/L         | 0.9 [0.7, 1.1]               | 0.9 [0.7, 1.1]              | 0.827                     | 16 (1.5)                       |
| LDL-C, mmol/L         | 2.1 [1.6, 2.8]               | 2.1 [1.6, 2.8]              | 0.933                     | 15 (1.4)                       |

HDL-C, high-density lipoprotein cholesterol; LDL-C, low-density lipoprotein cholesterol;  
TC, total cholesterol.

**Table S2. Baseline demographic and clinical data of the study patients between single-vessel and multivessel disease**

| <b>Characteristic</b>                     | <b>Single-vessel<br/>N = 165</b> | <b>Multivessel<br/>N = 896</b> | <b>P<br/>value</b> |
|-------------------------------------------|----------------------------------|--------------------------------|--------------------|
| Age, mean (SD), yrs                       | 60.9 (11.4)                      | 61.9 (10.3)                    | 0.276              |
| Male, No. (%)                             | 111 (67.3)                       | 678 (75.7)                     | 0.030              |
| SBP, mean (SD), mmHg                      | 145.5 (28.4)                     | 141.1 (24.6)                   | 0.039              |
| DBP, mean (SD), mmHg                      | 81.2 (15.2)                      | 78.5 (13.2)                    | 0.019              |
| Heart rate, mean (SD), beats/min          | 80.8 (15.4)                      | 80.7 (14.8)                    | 0.985              |
| Medical history and risk factors, No. (%) |                                  |                                |                    |
| Hypertension                              | 148 (89.7)                       | 835 (93.2)                     | 0.156              |
| Diabetes mellitus                         | 72 (43.6)                        | 487 (54.4)                     | 0.014              |
| Current smoker                            | 32 (19.4)                        | 161 (18.0)                     | 0.744              |
| Atrial fibrillation                       | 17 (10.3)                        | 72 (8.0)                       | 0.416              |
| Cerebrovascular disease                   | 25 (15.2)                        | 172 (19.2)                     | 0.263              |
| Valvular disease                          | 4 (2.4)                          | 30 (3.3)                       | 0.705              |
| Peripheral arterial disease               | 19 (11.5)                        | 85 (9.5)                       | 0.507              |
| Dialysis modality, No. (%)                |                                  |                                | 1.000              |
| Hemodialysis                              | 152 (92.1)                       | 823 (91.9)                     |                    |
| Peritoneal dialysis                       | 13 (7.9)                         | 73 (8.1)                       |                    |
| Vintage, yrs                              |                                  |                                | 0.721              |
| <1                                        | 36 (21.8)                        | 184 (20.5)                     |                    |
| 1-5                                       | 76 (46.1)                        | 414 (46.2)                     |                    |
| 5-10                                      | 39 (23.6)                        | 239 (26.7)                     |                    |
| ≥10                                       | 14 (8.5)                         | 59 (6.6)                       |                    |
| Cause of dialysis, No. (%)                |                                  |                                | 0.023              |
| Diabetes mellitus                         | 35 (21.2)                        | 291 (32.5)                     |                    |
| Hypertension                              | 24 (14.5)                        | 105 (11.7)                     |                    |
| Glomerulonephritis                        | 50 (30.3)                        | 209 (23.3)                     |                    |
| Other/unknown                             | 56 (33.9)                        | 291 (32.5)                     |                    |
| Index presentation, No. (%)               |                                  |                                | <0.001             |
| AMI                                       | 67 (40.6)                        | 561 (62.6)                     |                    |
| Non-AMI                                   | 98 (59.4)                        | 335 (37.4)                     |                    |
| Hemoglobin, g/L                           | 106.8 (19.3)                     | 104.9 (20.0)                   | 0.255              |
| Glucose, mmol/L                           | 5.6 [4.6, 7.9]                   | 6.5 [4.9, 9.4]                 | 0.001              |
| Serum creatinine, mg/dl                   | 8.6 [6.7, 11.4]                  | 8.6 [6.7, 10.8]                | 0.920              |
| TG, mmol/L                                | 1.5 [0.9, 2.0]                   | 1.6 [1.1, 2.3]                 | 0.002              |
| TC, mmol/L                                | 3.5 [3.1, 4.4]                   | 3.7 [3.1, 4.5]                 | 0.451              |
| HDL-C, mmol/L                             | 0.9 [0.8, 1.2]                   | 0.9 [0.7, 1.1]                 | 0.009              |
| LDL-C, mmol/L                             | 2.0 [1.6, 2.7]                   | 2.1 [1.6, 2.8]                 | 0.236              |

|                                   |                   |                   |        |
|-----------------------------------|-------------------|-------------------|--------|
| TyG index                         | 8.8 [8.3, 9.3]    | 9.1 [8.6, 9.6]    | <0.001 |
| Procedure characteristic, No. (%) |                   |                   |        |
| Radial access                     | 135 (81.8)        | 688 (76.8)        | 0.186  |
| Any left main disease             | 0 (0.0)           | 118 (13.2)        | <0.001 |
| Moderate or severe calcification  | 43 (26.1)         | 430 (48.0)        | <0.001 |
| Gensini score                     | 20.0 [10.0, 34.0] | 59.5 [39.0, 86.0] | <0.001 |
| PCI treatment                     | 82 (49.7)         | 664 (74.1)        | <0.001 |
| Discharge medications, No. (%)    |                   |                   |        |
| Dual antiplatelet therapy         | 116 (70.3)        | 806 (90.0)        | <0.001 |
| ACE inhibitor or ARB              | 72 (43.6)         | 416 (46.4)        | 0.564  |
| Beta-blocker                      | 120 (72.7)        | 737 (82.3)        | 0.006  |
| Calcium-channel blocker           | 115 (69.7)        | 569 (63.5)        | 0.150  |
| Statin                            | 151 (91.5)        | 843 (94.1)        | 0.283  |

Data are presented as mean (SD) or n (%).

ACE, angiotensin-converting enzyme; AMI, acute myocardial infarction; ARB, angiotensin receptor blocker; DBP, diastolic blood pressure; HDL-C, high-density lipoprotein cholesterol; LDL-C, low-density lipoprotein cholesterol; PCI, percutaneous coronary intervention; SBP, systolic blood pressure; TC, total cholesterol; TG, triglycerides; TyG, triglyceride-glucose index.

**Table S3. Baseline demographic and clinical data of the study patients according to the Gensini score**

| <b>Characteristic</b>                     | <b>GS ≤73<br/>N = 709</b> | <b>GS &gt;73<br/>N = 352</b> | <b>P<br/>value</b> |
|-------------------------------------------|---------------------------|------------------------------|--------------------|
| Age, mean (SD), yrs                       | 61.8 (10.5)               | 61.7 (10.4)                  | 0.813              |
| Male, No. (%)                             | 518 (73.1)                | 271 (77.0)                   | 0.192              |
| SBP, mean (SD), mmHg                      | 144.1 (25.1)              | 136.9 (25.0)                 | <0.001             |
| DBP, mean (SD), mmHg                      | 79.9 (13.6)               | 76.9 (13.3)                  | 0.001              |
| Heart rate, mean (SD), beats/min          | 80.2 (15.0)               | 81.8 (14.5)                  | 0.119              |
| Medical history and risk factors, No. (%) |                           |                              |                    |
| Hypertension                              | 655 (92.4)                | 328 (93.2)                   | 0.731              |
| Diabetes mellitus                         | 366 (51.6)                | 193 (54.8)                   | 0.358              |
| Current smoker                            | 132 (18.6)                | 61 (17.3)                    | 0.669              |
| Atrial fibrillation                       | 58 (8.2)                  | 31 (8.8)                     | 0.819              |
| Cerebrovascular disease                   | 138 (19.5)                | 59 (16.8)                    | 0.326              |
| Valvular disease                          | 19 (2.7)                  | 15 (4.3)                     | 0.233              |
| Peripheral arterial disease               | 76 (10.7)                 | 28 (8.0)                     | 0.188              |
| Dialysis modality, No. (%)                |                           |                              | 1.000              |
| Hemodialysis                              | 652 (92.0)                | 323 (91.8)                   |                    |
| Peritoneal dialysis                       | 57 (8.0)                  | 29 (8.2)                     |                    |
| Vintage, yrs                              |                           |                              | 0.627              |
| <1                                        | 141 (19.9)                | 79 (22.4)                    |                    |
| 1-5                                       | 337 (47.5)                | 153 (43.5)                   |                    |
| 5-10                                      | 183 (25.8)                | 95 (27.0)                    |                    |
| ≥10                                       | 48 (6.8)                  | 25 (7.1)                     |                    |
| Cause of dialysis, No. (%)                |                           |                              | 0.593              |
| Diabetes mellitus                         | 214 (30.2)                | 112 (31.8)                   |                    |
| Hypertension                              | 86 (12.1)                 | 43 (12.2)                    |                    |
| Glomerulonephritis                        | 182 (25.7)                | 77 (21.9)                    |                    |
| Other/unknown                             | 227 (32.0)                | 120 (34.1)                   |                    |
| Index presentation, No. (%)               |                           |                              | <0.001             |
| AMI                                       | 378 (53.3)                | 250 (71.0)                   |                    |
| Non-AMI                                   | 331 (46.7)                | 102 (29.0)                   |                    |
| Hemoglobin, g/L                           | 104.7 (19.9)              | 106.1 (19.9)                 | 0.287              |
| Glucose, mmol/L                           | 6.0 [4.7, 8.7]            | 6.8 [5.2, 9.9]               | <0.001             |
| Serum creatinine, mg/dl                   | 8.7 [6.7, 10.9]           | 8.4 [6.6, 11.0]              | 0.806              |
| TG, mmol/L                                | 1.6 [1.1, 2.2]            | 1.7 [1.2, 2.4]               | 0.042              |
| TC, mmol/L                                | 3.7 [3.1, 4.5]            | 3.7 [3.1, 4.5]               | 0.901              |
| HDL-C, mmol/L                             | 0.9 [0.8, 1.1]            | 0.9 [0.7, 1.0]               | 0.006              |
| LDL-C, mmol/L                             | 2.1 [1.6, 2.8]            | 2.1 [1.7, 2.8]               | 0.722              |

|                                   |                   |                    |        |
|-----------------------------------|-------------------|--------------------|--------|
| TyG index                         | 9.0 [8.5, 9.5]    | 9.1 [8.7, 9.7]     | <0.001 |
| Procedure characteristic, No. (%) |                   |                    |        |
| Radial access                     | 572 (80.7)        | 251 (71.3)         | 0.001  |
| Any left main disease             | 22 (3.1)          | 96 (27.3)          | <0.001 |
| Moderate or severe calcification  | 291 (41.0)        | 182 (51.7)         | 0.001  |
| Gensini score                     | 39.0 [23.0, 52.0] | 97.0 [82.0, 120.0] | <0.001 |
| PCI treatment                     | 491 (69.3)        | 255 (72.4)         | 0.317  |
| Discharge medications, No. (%)    |                   |                    |        |
| Dual antiplatelet therapy         | 598 (84.3)        | 324 (92.0)         | 0.001  |
| ACE inhibitor or ARB              | 325 (45.8)        | 163 (46.3)         | 0.937  |
| Beta-blocker                      | 562 (79.3)        | 295 (83.8)         | 0.092  |
| Calcium-channel blocker           | 485 (68.4)        | 199 (56.5)         | <0.001 |
| Statin                            | 663 (93.5)        | 331 (94.0)         | 0.845  |

Data are presented as mean (SD) or n (%).

ACE, angiotensin-converting enzyme; AMI, acute myocardial infarction; ARB, angiotensin receptor blocker; DBP, diastolic blood pressure; GS, Gensini score; HDL-C, high-density lipoprotein cholesterol; LDL-C, low-density lipoprotein cholesterol; PCI, percutaneous coronary intervention; SBP, systolic blood pressure; TC, total cholesterol; TG, triglycerides; TyG, triglyceride-glucose index.

**Table S4. Baseline demographic and clinical data of the study patients between non-survivors and survivors**

| <b>Characteristic</b>                     | <b>Non-survivor<br/>N = 703</b> | <b>Survivor<br/>N = 358</b> | <b>P<br/>value</b> |
|-------------------------------------------|---------------------------------|-----------------------------|--------------------|
| Age, mean (SD), yrs                       | 60.1 (10.3)                     | 65.1 (10.0)                 | <0.001             |
| Male, No. (%)                             | 529 (75.2)                      | 260 (72.6)                  | 0.395              |
| SBP, mean (SD), mmHg                      | 143.3 (25.4)                    | 138.6 (24.7)                | 0.004              |
| DBP, mean (SD), mmHg                      | 80.1 (13.5)                     | 76.5 (13.5)                 | <0.001             |
| Heart rate, mean (SD), beats/min          | 79.9 (14.4)                     | 82.4 (15.6)                 | 0.012              |
| Medical history and risk factors, No. (%) |                                 |                             |                    |
| Hypertension                              | 648 (92.2)                      | 335 (93.6)                  | 0.483              |
| Diabetes mellitus                         | 349 (49.6)                      | 210 (58.7)                  | 0.007              |
| Current smoker                            | 138 (19.6)                      | 55 (15.4)                   | 0.105              |
| Atrial fibrillation                       | 45 (6.4)                        | 44 (12.3)                   | 0.002              |
| Cerebrovascular disease                   | 117 (16.6)                      | 80 (22.3)                   | 0.030              |
| Valvular disease                          | 19 (2.7)                        | 15 (4.2)                    | 0.264              |
| Peripheral arterial disease               | 64 (9.1)                        | 40 (11.2)                   | 0.336              |
| Dialysis modality, No. (%)                |                                 |                             | 0.192              |
| Hemodialysis                              | 652 (92.7)                      | 323 (90.2)                  |                    |
| Peritoneal dialysis                       | 51 (7.3)                        | 35 (9.8)                    |                    |
| Vintage, yrs                              |                                 |                             | 0.269              |
| <1                                        | 152 (21.6)                      | 68 (19.0)                   |                    |
| 1-5                                       | 310 (44.1)                      | 180 (50.3)                  |                    |
| 5-10                                      | 189 (26.9)                      | 89 (24.9)                   |                    |
| ≥10                                       | 52 (7.4)                        | 21 (5.9)                    |                    |
| Cause of dialysis, No. (%)                |                                 |                             | 0.002              |
| Diabetes mellitus                         | 193 (27.5)                      | 133 (37.2)                  |                    |
| Hypertension                              | 79 (11.2)                       | 50 (14.0)                   |                    |
| Glomerulonephritis                        | 185 (26.3)                      | 74 (20.7)                   |                    |
| Other/unknown                             | 246 (35.0)                      | 101 (28.2)                  |                    |
| Index presentation, No. (%)               |                                 |                             | <0.001             |
| AMI                                       | 384 (54.6)                      | 244 (68.2)                  |                    |
| Non-AMI                                   | 319 (45.4)                      | 114 (31.8)                  |                    |
| Hemoglobin, g/L                           | 105.4 (20.3)                    | 104.8 (19.2)                | 0.647              |
| Glucose, mmol/L                           | 5.8 [4.7, 8.3]                  | 7.4 [5.4, 10.4]             | <0.001             |
| Serum creatinine, mg/dl                   | 8.8 [6.9, 11.2]                 | 8.0 [6.5, 10.4]             | 0.004              |
| TG, mmol/L                                | 1.6 [1.1, 2.3]                  | 1.6 [1.1, 2.2]              | 0.695              |
| TC, mmol/L                                | 3.6 [3.1, 4.5]                  | 3.8 [3.1, 4.5]              | 0.326              |
| HDL-C, mmol/L                             | 0.9 [0.7, 1.1]                  | 0.9 [0.7, 1.1]              | 0.692              |
| LDL-C, mmol/L                             | 2.1 [1.6, 2.8]                  | 2.2 [1.7, 2.8]              | 0.386              |

|                                   |                   |                   |        |
|-----------------------------------|-------------------|-------------------|--------|
| TyG index                         | 9.0 [8.5, 9.5]    | 9.2 [8.7, 9.6]    | <0.001 |
| Procedure characteristic, No. (%) |                   |                   |        |
| Radial access                     | 560 (79.7)        | 263 (73.5)        | 0.027  |
| Any left main disease             | 61 (8.7)          | 57 (15.9)         | 0.001  |
| Moderate or severe calcification  | 294 (41.8)        | 179 (50.0)        | 0.014  |
| Multivessel                       | 568 (80.8)        | 328 (91.6)        | <0.001 |
| Gensini score                     | 48.0 [28.0, 77.5] | 62.8 [39.0, 90.0] | <0.001 |
| PCI treatment                     | 508 (72.3)        | 238 (66.5)        | 0.060  |
| Discharge medications, No. (%)    |                   |                   |        |
| Dual antiplatelet therapy         | 601 (85.5)        | 321 (89.7)        | 0.070  |
| ACE inhibitor or ARB              | 341 (48.5)        | 147 (41.1)        | 0.025  |
| Beta-blocker                      | 572 (81.4)        | 285 (79.6)        | 0.546  |
| Calcium-channel blocker           | 470 (66.9)        | 214 (59.8)        | 0.027  |
| Statin                            | 665 (94.6)        | 329 (91.9)        | 0.116  |

Data are presented as mean (SD) or n (%).

ACE, angiotensin-converting enzyme; AMI, acute myocardial infarction; ARB, angiotensin receptor blocker; DBP, diastolic blood pressure; HDL-C, high-density lipoprotein cholesterol; LDL-C, low-density lipoprotein cholesterol; PCI, percutaneous coronary intervention; SBP, systolic blood pressure; TC, total cholesterol; TG, triglycerides; TyG, triglyceride-glucose index.

**Table S5. Associations between triglyceride-glucose index and outcomes after excluding patients with missing data**

| <b>Characteristic</b> | <b>Univariate</b> |               |                       | <b>Multivariable</b> |               |                       |
|-----------------------|-------------------|---------------|-----------------------|----------------------|---------------|-----------------------|
|                       | <b>OR or HR</b>   | <b>95% CI</b> | <b><i>P</i> value</b> | <b>OR or HR</b>      | <b>95% CI</b> | <b><i>P</i> value</b> |
| High GS <sup>a</sup>  | 1.38              | 1.15-1.64     | <0.001                | 1.31                 | 1.09-1.58     | 0.004                 |
| Multivessel disease   | 1.65              | 1.31-2.07     | <0.001                | 1.54                 | 1.19-1.98     | 0.001                 |
| All-cause death       | 1.31              | 1.14-1.51     | <0.001                | 1.22                 | 1.05-1.43     | 0.009                 |
| Cardiovascular death  | 1.38              | 1.17-1.64     | <0.001                | 1.33                 | 1.10-1.60     | 0.003                 |

<sup>a</sup> High GS was defined as the top Gensini score tertile.

CI, confidence interval; GS, Gensini score; HR, hazard ratio; OR, odds ratio.



**Table S6. Associations between triglyceride-glucose index and outcomes after excluding patients received insulin therapy**

| <b>Characteristic</b> | <b>Univariate</b> |               |                       | <b>Multivariable</b> |               |                       |
|-----------------------|-------------------|---------------|-----------------------|----------------------|---------------|-----------------------|
|                       | <b>OR or HR</b>   | <b>95% CI</b> | <b><i>P</i> value</b> | <b>OR or HR</b>      | <b>95% CI</b> | <b><i>P</i> value</b> |
| High GS <sup>a</sup>  | 1.57              | 1.24-1.98     | <0.001                | 1.44                 | 1.12-1.85     | 0.004                 |
| Multivessel disease   | 2.01              | 1.50-2.70     | <0.001                | 1.91                 | 1.39-2.62     | <0.001                |
| All-cause death       | 1.41              | 1.17-1.70     | <0.001                | 1.33                 | 1.09-1.62     | 0.006                 |
| Cardiovascular death  | 1.62              | 1.28-2.05     | <0.001                | 1.49                 | 1.18-1.88     | 0.001                 |

<sup>a</sup> High GS was defined as the top Gensini score tertile.

CI, confidence interval; GS, Gensini score; HR, hazard ratio; OR, odds ratio.

**Table S7. Baseline demographic and clinical data of the study patients between patients with and without C-reaction protein data**

| <b>Characteristic</b>                     | <b>Patients with<br/>CRP data<br/>N = 631</b> | <b>Patients without<br/>CRP data<br/>N = 430</b> | <b>P<br/>value</b> |
|-------------------------------------------|-----------------------------------------------|--------------------------------------------------|--------------------|
| Age, mean (SD), yrs                       | 61.7 (10.3)                                   | 61.8 (10.7)                                      | 0.913              |
| Male, No. (%)                             | 487 (77.2)                                    | 302 (70.2)                                       | 0.013              |
| SBP, mean (SD), mmHg                      | 142.2 (24.6)                                  | 141.0 (26.2)                                     | 0.440              |
| DBP, mean (SD), mmHg                      | 78.5 (12.9)                                   | 79.5 (14.5)                                      | 0.218              |
| Heart rate, mean (SD), beats/min          | 81.1 (15.2)                                   | 80.3 (14.3)                                      | 0.393              |
| Medical history and risk factors, No. (%) |                                               |                                                  |                    |
| Hypertension                              | 586 (92.9)                                    | 397 (92.3)                                       | 0.831              |
| Diabetes mellitus                         | 346 (54.8)                                    | 213 (49.5)                                       | 0.102              |
| Current smoker                            | 120 (19.0)                                    | 73 (17.0)                                        | 0.444              |
| Atrial fibrillation                       | 56 (8.9)                                      | 33 (7.7)                                         | 0.562              |
| Cerebrovascular disease                   | 131 (20.8)                                    | 66 (15.3)                                        | 0.032              |
| Valvular disease                          | 22 (3.5)                                      | 12 (2.8)                                         | 0.650              |
| Peripheral arterial disease               | 65 (10.3)                                     | 39 (9.1)                                         | 0.577              |
| Dialysis modality, No. (%)                |                                               |                                                  | 0.403              |
| Hemodialysis                              | 584 (92.6)                                    | 391 (90.9)                                       |                    |
| Peritoneal dialysis                       | 47 (7.4)                                      | 39 (9.1)                                         |                    |
| Vintage, yrs                              |                                               |                                                  | 0.641              |
| <1                                        | 130 (20.6)                                    | 90 (20.9)                                        |                    |
| 1-5                                       | 299 (47.4)                                    | 191 (44.4)                                       |                    |
| 5-10                                      | 157 (24.9)                                    | 121 (28.1)                                       |                    |
| ≥10                                       | 45 (7.1)                                      | 28 (6.5)                                         |                    |
| Cause of dialysis, No. (%)                |                                               |                                                  | <0.001             |
| Diabetes mellitus                         | 209 (33.1)                                    | 117 (27.2)                                       |                    |
| Hypertension                              | 78 (12.4)                                     | 51 (11.9)                                        |                    |
| Glomerulonephritis                        | 177 (28.1)                                    | 82 (19.1)                                        |                    |
| Other/unknown                             | 167 (26.5)                                    | 180 (41.9)                                       |                    |
| Index presentation, No. (%)               |                                               |                                                  | 0.999              |
| AMI                                       | 374 (59.3)                                    | 254 (59.1)                                       |                    |
| Non-AMI                                   | 257 (40.7)                                    | 176 (40.9)                                       |                    |
| Hemoglobin, g/L                           | 104.3 (20.3)                                  | 106.4 (19.3)                                     | 0.097              |
| Glucose, mmol/L                           | 6.1 [4.8, 9.1]                                | 6.5 [4.8, 9.0]                                   | 0.352              |
| Serum creatinine, mg/dl                   | 8.8 [6.6, 11.1]                               | 8.4 [6.7, 10.7]                                  | 0.276              |
| TG, mmol/L                                | 1.5 [1.1, 2.2]                                | 1.7 [1.2, 2.4]                                   | 0.003              |
| TC, mmol/L                                | 3.7 [3.1, 4.4]                                | 3.7 [3.1, 4.6]                                   | 0.351              |
| HDL-C, mmol/L                             | 0.9 [0.7, 1.1]                                | 0.9 [0.7, 1.1]                                   | 0.324              |

|                                   |                   |                   |       |
|-----------------------------------|-------------------|-------------------|-------|
| LDL-C, mmol/L                     | 2.1 [1.7, 2.7]    | 2.1 [1.6, 2.8]    | 0.847 |
| Procedure characteristic, No. (%) |                   |                   |       |
| Radial access                     | 471 (74.6)        | 352 (81.9)        | 0.007 |
| Any left main disease             | 66 (10.5)         | 52 (12.1)         | 0.465 |
| Moderate or severe calcification  | 278 (44.1)        | 195 (45.3)        | 0.724 |
| Multivessel                       | 536 (84.9)        | 360 (83.7)        | 0.650 |
| Gensini score                     | 52.0 [32.0, 78.5] | 54.0 [31.0, 86.0] | 0.125 |
| PCI treatment                     | 448 (71.0)        | 298 (69.3)        | 0.599 |
| Discharge medications, No. (%)    |                   |                   |       |
| Dual antiplatelet therapy         | 539 (85.4)        | 383 (89.1)        | 0.102 |
| ACE inhibitor or ARB              | 313 (49.6)        | 175 (40.7)        | 0.005 |
| Beta-blocker                      | 513 (81.3)        | 344 (80.0)        | 0.654 |
| Calcium-channel blocker           | 401 (63.5)        | 283 (65.8)        | 0.489 |
| Statin                            | 598 (94.8)        | 396 (92.1)        | 0.103 |

Data are presented as mean (SD) or n (%).

ACE, angiotensin-converting enzyme; AMI, acute myocardial infarction; ARB, angiotensin receptor blocker; CRP, C-reaction protein; DBP, diastolic blood pressure; HDL-C, high-density lipoprotein cholesterol; LDL-C, low-density lipoprotein cholesterol; PCI, percutaneous coronary intervention; SBP, systolic blood pressure; TC, total cholesterol; TG, triglycerides.

**Table S8. Associations between triglyceride-glucose index and outcomes in 631 patients with available C-reactive protein data**

| Characteristic | High GS <sup>a</sup> |                | Multivessel disease |                | All-cause death     |                | Cardiovascular death |                |
|----------------|----------------------|----------------|---------------------|----------------|---------------------|----------------|----------------------|----------------|
|                | OR/HR (95% CI)       | <i>P</i> value | OR/HR (95% CI)      | <i>P</i> value | OR/HR (95% CI)      | <i>P</i> value | OR/HR (95% CI)       | <i>P</i> value |
| Univariate     |                      |                |                     |                |                     |                |                      |                |
| TyG index      | 1.683 (1.331-2.130)  | <0.001         | 1.650 (1.224-2.225) | 0.001          | 1.368 (1.147-1.632) | <0.001         | 1.496 (1.210-1.851)  | <0.001         |
| CRP            | 1.005 (1.001-1.009)  | 0.009          | 1.007 (0.999-1.014) | 0.075          | 1.006 (1.003-1.008) | <0.001         | 1.006 (1.003-1.009)  | <0.001         |
| Multivariable  |                      |                |                     |                |                     |                |                      |                |
| TyG index      | 1.555 (1.193-2.026)  | 0.001          | 1.471 (1.065-2.030) | 0.019          | 1.242 (1.022-1.510) | 0.029          | 1.423 (1.126-1.799)  | 0.003          |
| CRP            | 1.002 (0.997-1.006)  | 0.471          | 1.003 (0.996-1.011) | 0.365          | 1.004 (1.001-1.006) | 0.017          | 1.003 (0.999-1.006)  | 0.124          |

<sup>a</sup> High GS was defined as the top Gensini score tertile.

CI, confidence interval; CRP, C-reactive protein; GS, Gensini score; HR, hazard ratio; OR, odds ratio.

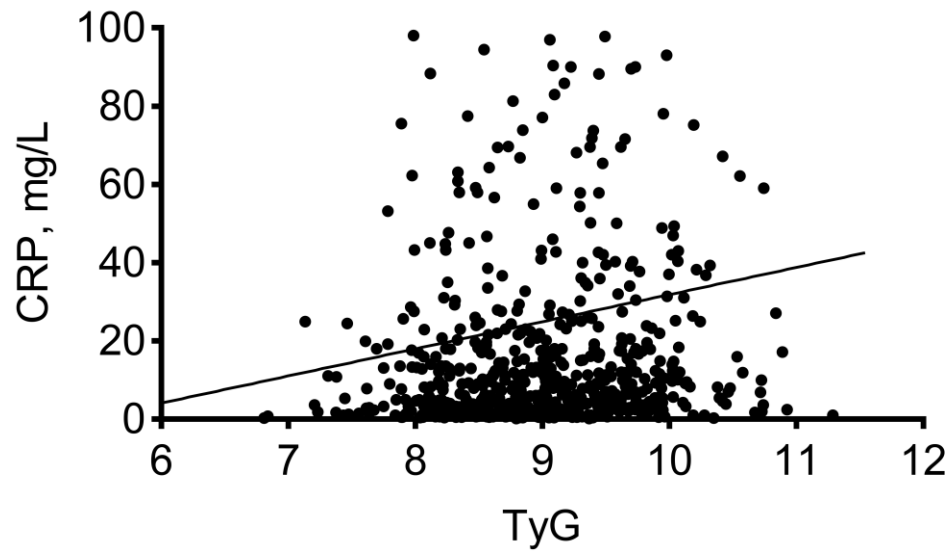

**Figure S1. Scatter plots depicting the correlation between the triglyceride-glucose index and C-reactive protein**
